# Supplementary material for: Mass SARS-CoV-2 serological screening, a population-based study in the Principality of Andorra
Source: PubMed Central journal article supplement — Lancet Reg Health Eur. 2021 May 21;5:100119. doi: 10.1016/j.lanepe.2021.100119 (PMC8454851; doi:10.1016/j.lanepe.2021.100119), 2021-05-21

## Supplementary Appendix

### 1. Methods

#### Data collection

Data collection is done through a computer application using the principle of the blind experiment, in which the individuals who enter the data of the participants do not have access to the result, and the person performing the test does not know the identity of the participant. The information is recorded in a database managed by the Ministry of Health in accordance with Law 15/2003, of 18 December, qualified as personal data protection) complies with all the rules on Privacy Policy established in [https:// coronavirus .govern.ad / privacy](https://coronavirus.govern.ad/privacy)

The data used in epidemiological studies will be those provided by individuals using these forms, and will receive a legitimate treatment specifically in Article 20.f of the LQPD which requires that the data be kept indefinitely, so action will be taken. specific security features of this treatment such as the encryption of the data as long as there is no study that requires them. In this case, the only recipients of personal (non-anonymized) data that have been provided to date, without limiting that the list may be legitimately expanded in the future, are the Andorra Health Care Service (SAAS) and the Government of Andorra, including its Ministries that have access to the data due to the epidemic.

Note that both the Department of Government Statistics and the World Health Organization (WHO) or other organizations in other countries will receive data of the Ministry of Health.

The following variables were collected (Figure 4).

- Socio-demographic data: identification number, name, surname, age, parish of residence, occupation.
- Identification number of the family nucleus associated with each participant.
- Symptoms present or absent 15 days before the survey or at the moment of the survey.

- Presence or absence of IgG and IgM immunoglobulins of each participant in the first and second cross.
- PCR result (positive / negative) of IGM + participants (suitable for PCR following protocol of the Ministry of Health).

## 2. Supplementary tables

**Table 1. Timetable of the restrictions in Andorra**

|                 |                                                                                                                               |
|-----------------|-------------------------------------------------------------------------------------------------------------------------------|
| <b>March 2</b>  | First coronavirus case confirmed in Andorra.                                                                                  |
| <b>March 12</b> | Ski stations were closed                                                                                                      |
| <b>March 13</b> | Partial confinement.                                                                                                          |
| <b>March 16</b> | Schools were closed                                                                                                           |
| <b>March 18</b> | Total confinement.                                                                                                            |
| <b>April 7</b>  | Beginning of masks delivery and progressive use of population                                                                 |
| <b>April 17</b> | Allowance of 1 hour of walk in 1km radius every two days                                                                      |
| <b>April 20</b> | Phase 1 reopening. Low risk economic activities resume. 1000 people return to work.                                           |
| <b>May 1</b>    | Start training and screening volunteers.                                                                                      |
| <b>May 4</b>    | Start of 1st round of population serology screening.                                                                          |
| <b>May 4</b>    | Phase 2 reopening. Additional 4760 workers return to normal activity.                                                         |
| <b>May 13</b>   | Increase to 2 hours of activity every day to walk or exercise.                                                                |
| <b>May 18</b>   | Start of 2nd round of population serology screening.<br>Phase 3 reopening. Additional 3300 workers return to normal activity. |
| <b>June 1</b>   | Confinement restrictions completely lifted.                                                                                   |
| <b>June 15</b>  | French and Spanish borders are open (with some restrictions on the Spanish side).                                             |

**Table 2. Interpretation of SARS-CoV-2 serologic test**

| <b>Day-0</b> | <b>Day-14</b> | <b>Interpretation</b>    | <b>Recommendation</b>                     |
|--------------|---------------|--------------------------|-------------------------------------------|
| IgM - IgG +  | IgM- IgG+     | Past and cured infection | No isolate                                |
| IgM - IgG -  | IgM - IgG -   | No infected              | No isolate                                |
| IgM + IgG +  | IgM - IgG +   | Past infection           | Isolate 7 days or confirming test RT-PCR  |
| IgM + IgG -  | IgM - IgG +   | Recent infection         | Isolate 14 days or confirming test RT-PCR |
| IgM - IgG -  | IgM + IgG -   | Acute infection          | Isolate 14 days or confirming test RT-PCR |

**Table 3. Serology RDT Livzon validation**

**A. Samples with a COVID-19 diagnostic by any technique**

| Antibody | Diagnosis<br>COVID-19<br>positive/<br>Negative<br>serology | Pre-<br>pandemic/<br>Positive<br>serology | Pre-<br>pandemic/<br>Negative<br>serology | Diagnosis<br>COVID-19<br>positive/<br>Positive<br>serology | Total | SE<br>(%) | SP<br>(%) | PPV<br>(%) | NPV<br>(%) | Days since<br>onset of<br>symptoms |
|----------|------------------------------------------------------------|-------------------------------------------|-------------------------------------------|------------------------------------------------------------|-------|-----------|-----------|------------|------------|------------------------------------|
| IgM      | 42                                                         | 2                                         | 125                                       | 59                                                         | 228   | 58        | 98        | 97         | 75         | Any                                |
| IgG      | 37                                                         | 1                                         | 127                                       | 73                                                         | 238   | 66        | 99        | 99         | 77         | Any                                |
| IgM+IgG  | 31                                                         | 3                                         | 124                                       | 77                                                         | 235   | 71        | 98        | 96         | 80         | Any                                |
| IgM      | 9                                                          | 2                                         | 125                                       | 23                                                         | 159   | 72        | 98        | 92         | 93         | ≥ 14 days                          |
| IgG      | 8                                                          | 1                                         | 127                                       | 29                                                         | 165   | 78        | 99        | 97         | 94         | ≥ 14 days                          |
| IgM+IgG  | 8                                                          | 3                                         | 124                                       | 29                                                         | 164   | 78        | 98        | 91         | 94         | ≥ 14 days                          |
| IgM      | 9                                                          | 2                                         | 125                                       | 17                                                         | 153   | 65        | 98        | 89         | 93         | ≥ 21 days                          |
| IgG      | 8                                                          | 1                                         | 127                                       | 22                                                         | 158   | 73        | 99        | 96         | 94         | ≥ 21 days                          |
| IgM+IgG  | 8                                                          | 3                                         | 124                                       | 22                                                         | 157   | 73        | 98        | 88         | 94         | ≥ 21 days                          |

Legend tables: An evaluation of the RDT was performed at the ISGlobal laboratory (Barcelona, Spain) in August 2020 following FIND recommendations (<https://www.finddx.org/covid-19/sarscov2-eval-immuno/>). The study tested 119 plasma/serum samples from individuals with a confirmed past/current diagnosis of COVID-19, including 109 rRT-PCR-confirmed positive samples, and 129 prepandemic negative controls. We found that the combined sensitivity (IgM-IgG) ranged from 0.72 - 0.78 depending on the days since symptoms onset and 0.71 – 0.81 when positive samples were PCR-confirmed (supplementary table). Specificity ranged from 0.98 – 0.99.

SE, sensibility; SP, specificity; PPV, positive predictive value; NPV, negative predictive value.

**B. Samples with a COVID-19 diagnostic by PCR**

| Antibody | Diagnosis<br>COVID-19<br>positive/<br>Negative<br>serology | Pre-<br>pandemic/<br>Positive<br>serology | Pre-<br>pandemic/<br>Negative<br>serology | Diagnosis<br>COVID-19<br>positive/<br>Positive<br>serology | Total | SE<br>(%) | SP<br>(%) | PPV<br>(%) | NPV<br>(%) | Days since<br>onset of<br>symptoms |
|----------|------------------------------------------------------------|-------------------------------------------|-------------------------------------------|------------------------------------------------------------|-------|-----------|-----------|------------|------------|------------------------------------|
| IgM      | 40                                                         | 2                                         | 125                                       | 53                                                         | 220   | 57        | 98        | 96         | 76         | Any                                |
| IgG      | 35                                                         | 1                                         | 127                                       | 66                                                         | 229   | 65        | 99        | 99         | 78         | Any                                |
| IgM+IgG  | 29                                                         | 3                                         | 124                                       | 70                                                         | 226   | 71        | 98        | 96         | 81         | Any                                |
| IgM      | 7                                                          | 2                                         | 125                                       | 20                                                         | 154   | 74        | 98        | 91         | 95         | ≥ 14 days                          |
| IgG      | 6                                                          | 1                                         | 127                                       | 25                                                         | 159   | 81        | 99        | 96         | 95         | ≥ 14 days                          |
| IgM+IgG  | 6                                                          | 3                                         | 124                                       | 25                                                         | 158   | 81        | 98        | 89         | 95         | ≥ 14 days                          |
| IgM      | 7                                                          | 2                                         | 125                                       | 17                                                         | 151   | 71        | 98        | 89         | 95         | ≥ 21 days                          |
| IgG      | 6                                                          | 1                                         | 127                                       | 21                                                         | 155   | 78        | 99        | 95         | 95         | ≥ 21 days                          |
| IgM+IgG  | 6                                                          | 3                                         | 124                                       | 21                                                         | 154   | 78        | 98        | 88         | 95         | ≥ 21 days                          |

SE, sensibility; SP, specificity; PPV, positive predictive value; NPV, negative predictive value.

**Table 4. Participants situation in front of infection in each contact**

| Serological Test Combination | First Cross<br>N=70,500 | Second Cross<br>N=63,735 |
|------------------------------|-------------------------|--------------------------|
| IgM-/IgG-                    | 63,584 (90.19%)         | 58,281 (91.44%)          |
| IgM+/IgG-                    | 4,277 (6.07%)           | 3,541 (5.56%)            |
| IgM+/IgG+                    | 1,683 (2.39%)           | 1,234 (1.94%)            |
| IgM-/IgG+                    | 837 (1.19%)             | 649 (1.02%)              |
| Not conclusive or miss value | 119 (0.17%)             | 30 (0.05%)               |

**Figure 1. Epidemic curve of COVID19 cases in Andorra from up to end of May 2020**

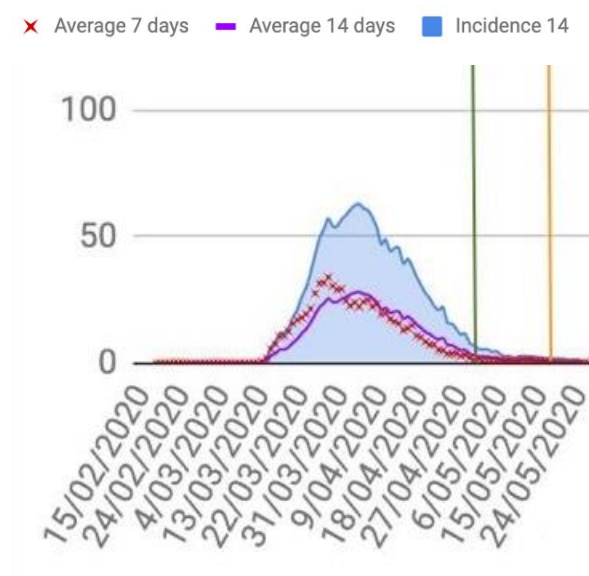

The green line represents the start date of the first seroprevalence survey. The yellow line represents the start of the second seroprevalence survey.

**Figure 2. Study Timetable**

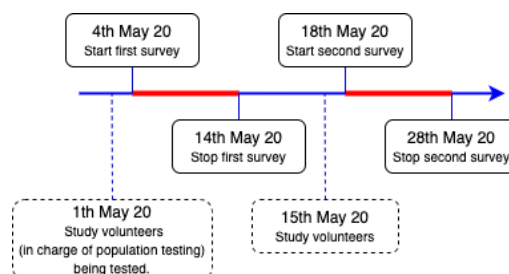

**Figure 3. Participant's questionnaire**

The screenshot shows a web form for editing patient information. At the top left is a blue button labeled 'ENRERE'. Below it is the title 'Editar pacient'. On the right side, there are two tabs: 'PERSONAL' (active) and 'SCREENINGS'. The main section is titled 'INFORMACIÓ PACIENT' and contains several input fields: 'NÚMERO DE CENS:' (text box), 'NOM:' (text box), 'COGNOM:' (text box), 'TELÉFON DE CONTACTE:' (text box), 'CORREU ELECTRÒNIC:' (text box), 'PARISH:' (dropdown menu), 'SIMPTOMATOLOGIA A DIA D'AVUI:' (checkbox), 'SIMPTOMATOLOGIA ÚLTIMS 15 DIES:' (checkbox), 'PERSONAL SANITARI:' (checkbox), 'ESTUDIANT:' (checkbox with a blue checkmark), and 'METGE REFERENT:' (dropdown menu). At the bottom left are two buttons: 'GUARDAR' (blue) and 'CANCEL·LAR' (grey).

- *Identification Number:*
- *Name:*
- *Surname:*
- *Cell phone number:*
- *Email:*
- *Parish:*
- *Covid-19 related Symptoms today:*
- *Covid-19 related Symptoms in last 15 days:*
- *Health care worker:*
- *Student:*
- *Referent physician:*

**Figure 4. Survey algorithm**

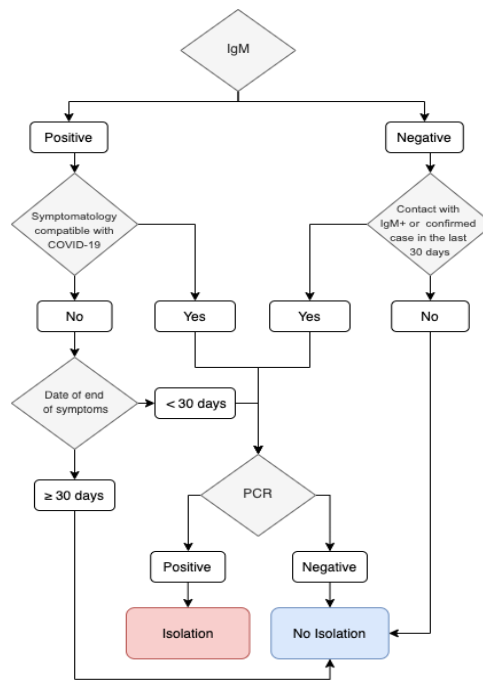

**Figure 5. Regional distribution by seasonal worker**

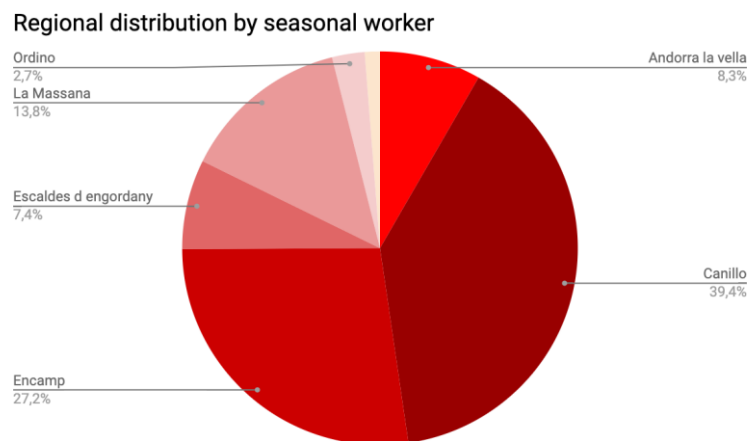

Supplement: mmc1.pdf [file mmc1.pdf]
